# Supplementary material for: Theoretical investigation of width effects in the electronic and transport properties of carbon nanoribbons with 5-8-5 carbon rings: a first-principles study
Source: Royal Society of Chemistry journal article supplement (doi:10.1039/d3tc03701k), 2024-01-01
Supplement: d3tc03701k1.pdf [file d3tc03701k1.pdf]

# Theoretical investigation of width effect in electronic and transport properties of carbon nanoribbons with 5-8-5 carbon rings: a first principle study

Elder Augusto Viana Mota,<sup>\*a</sup> Carlos Alberto Brito da Silva Jr<sup>b</sup> and Jordan Del Nero<sup>c</sup>

<sup>a</sup> Pós-Graduação em Física, Universidade Federal do Pará, Belém, PA, 66075-110, Brazil.

<sup>b</sup> Faculdade de Ciências Exatas e Tecnologia, Universidade Federal do Pará, 68440-000, Abaetetuba, PA, Brasil.

<sup>c</sup> Faculdade de Física, Universidade Federal do Pará, Ananindeua, PA, 67113-901, Brazil.

<sup>d</sup> Faculdade de Física, Universidade Federal do Pará, Belém, PA, 66075-110, Brazil.

\*Corresponding Author: E-Mail: elder.mota@icen.ufpa.br

## Supporting Information (SI)

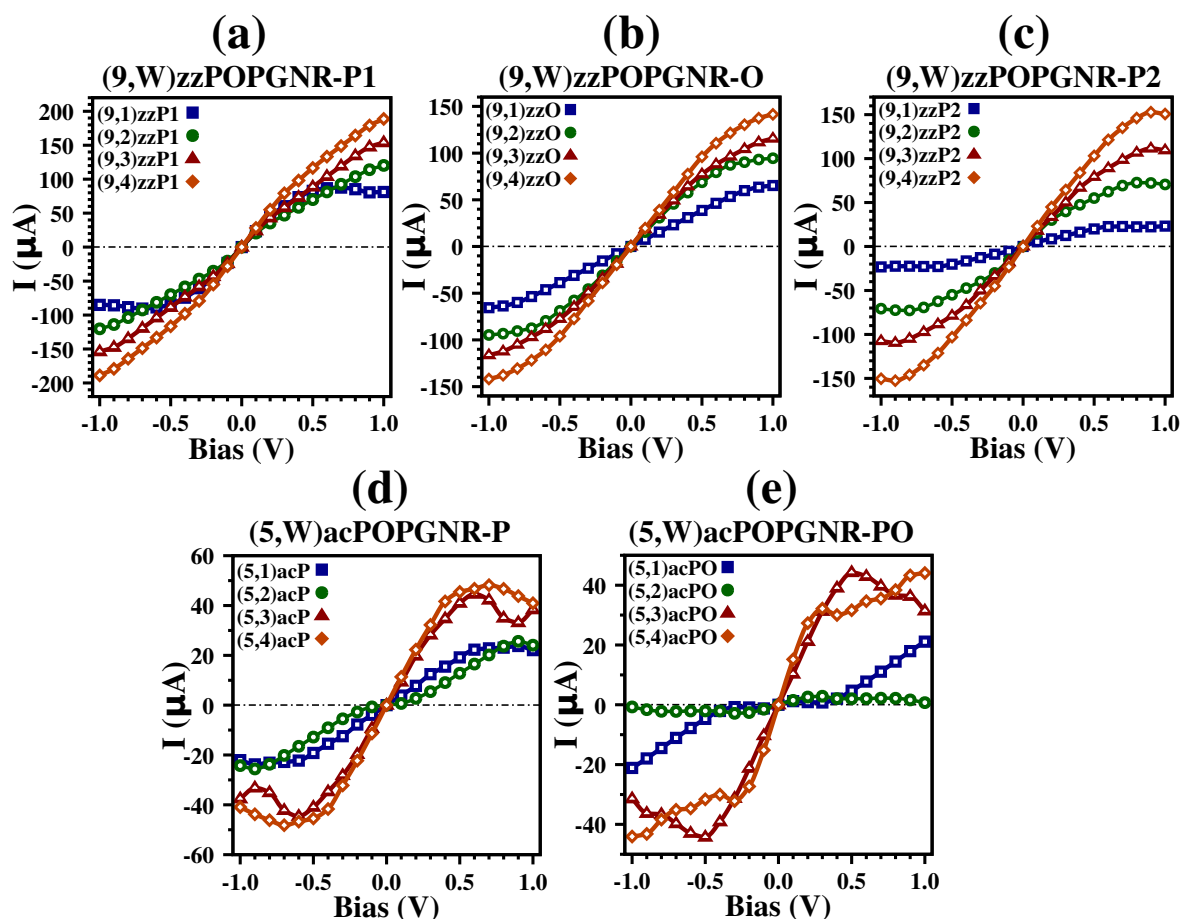

**Fig. S1.** Comparative of  $I$ - $V$  curve for all molecular devices: (a)  $(9,w)zzP1$ , (b)  $(9,w)zzO$ , (c)  $(9,w)zzP2$ , (d)  $(5,w)acP$ , and (e)  $(5,w)acPO$ . We clearly see that the  $I$  values of  $zz$  nanoribbons are higher than  $ac$  cases.

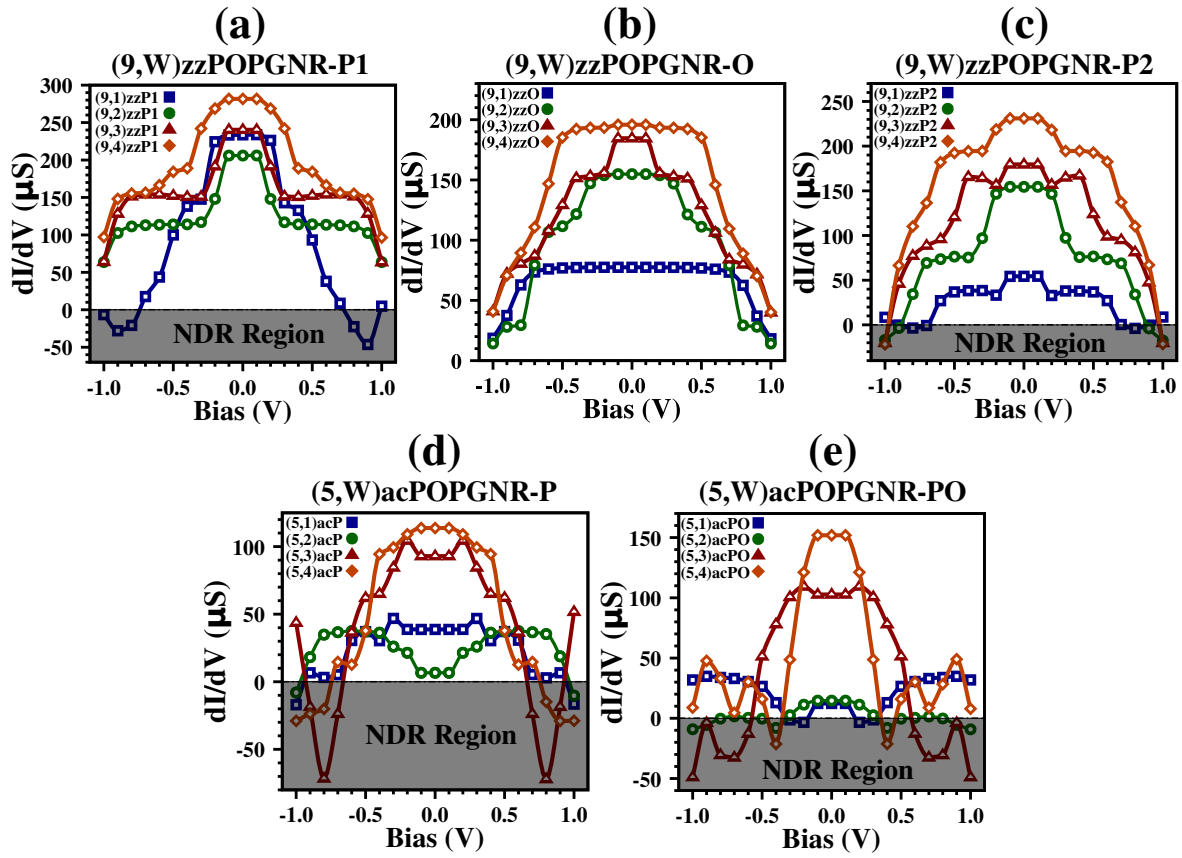

**Fig. S2.** Comparative of  $(dI/dV)$ - $V$  curve for all molecular devices: (a)  $(9,w)zzP1$ , (b)  $(9,w)zzO$ , (c)  $(9,w)zzP2$ , (d)  $(5,w)acP$ , and (e)  $(5,w)acPO$ . We clearly see that the conductance of  $zz$  nanoribbons are higher than  $ac$  cases.
